# Supplementary material for: MutS HOMOLOG1 silencing mediates ORF220 substoichiometric shifting and causes male sterility in Brassica juncea
Source: PubMed Central journal article supplement (PMC4682445; doi:10.1093/jxb/erv480), 2015-10-29
Supplement: supp_erv480_supplementary_Figures_S1_S9_Tables_S1_S3.pdf [file supp_erv480_supplementary_Figures_S1_S9_Tables_S1_S3.pdf]

**MutS HOMOLOG1 silencing mediates *ORF220* substoichiometric shifting and causes male sterility in *Brassica juncea***

Na Zhao, Xinyue Xu, Yashitola Wamboldt, Sally A. Mackenzie, Xiaodong Yang, Zhongyuan Hu,

Jinghua Yang<sup>\*</sup>, Mingfang Zhang

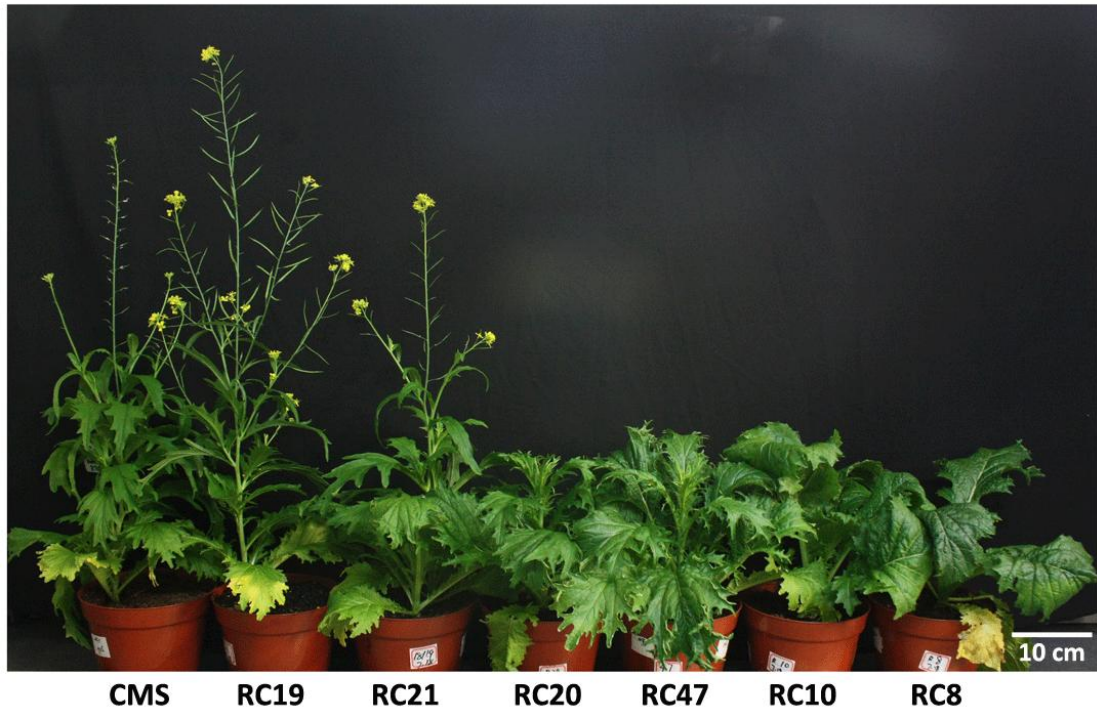

Figure S1 Candidate revertant lines of *B. juncea*.

```

*      20      *      40      *      60      *      80      *      100     *      120     *      140     *      160     *
R19 : AATGAGTCCGCTTCAATATTCACAAACCGCTACTAGATAGATATCAGATATTATGGATACGATTCATTCAGAGGTCCTTGGGGTAAAGGTATAGACACGGAGAGTCAAAATCTGTGCTAAAAGCGTGGAGGTCGAGCTCTTCAAGGCAATATAGAA : 170
MF : AATGAGTCCGCTTCAATATTCACAAACCGCTACTAGATAGATATCAGATATTATGGATACGATTCATTCAGAGGTCCTTGGGGTAAAGGTATAGACACGGAGAGTCAAAATCTGTGCTAAAAGCGTGGAGGTCGAGCTCTTCAAGGCAATATAGAA : 170
ATGAGTCCGCTTCAATATTCACAAACCGCTACTAGATAGATATCAGATATTATGGATACGATTCATTCAGAGGTCCTTGGGGTAAAGGTATAGACACGGAGAGTCAAAATCTGTGCTAAAAGCGTGGAGGTCGAGCTCTTCAAGGCAATATAGAA
*      180      *      200     *      220     *      240     *      260     *      280     *      300     *      320     *      340
R19 : ATGGATAAGTTCGGCAGCGGATCGGGAATCTGGGATCTTCTTATCTAATGAATGGGGGAGGAGTCCGCTTGAATATCGCCCGTCCGCCCCCGAGTATATGATTCAACAGGAATCAACAGAGGTAAGTATGATCAATCAACCTCGTAAATGCCCC : 340
MF : ATGGATAAGTTCGGCAGCGGATCGGGAATCTGGGATCTTCTTATCTAATGAATGGGGGAGGAGTCCGCTTGAATATCGCCCGTCCGCCCCCGAGTATATGATTCAACAGGAATCAACAGAGGTAAGTATGATCAATCAACCTCGTAAATGCCCC : 340
ATGGATAAGTTCGGCAGCGGATCGGGAATCTGGGATCTTCTTATCTAATGAATGGGGGAGGAGTCCGCTTGAATATCGCCCGTCCGCCCCCGAGTATATGATTCAACAGGAATCAACAGAGGTAAGTATGATCAATCAACCTCGTAAATGCCCC
*      360      *      380     *      400     *      420     *      440     *      460     *      480     *      500
R19 : GGTAAACCAGCAGTAAGTAAGTACTTTAGGGATGGTCATACCATTGATGACACTTGGACAGGATGGAGTTACCAAAATGGGACTATCGGGTGGGTAATGAAATAGACGCGTGGGGATTCGAGGCTCTCTTCTTGGACCTTAA : 510
MF : GGTAAACCAGCAGTAAGTAAGTACTTTAGGGATGGTCATACCATTGATGACACTTGGACAGGATGGAGTTACCAAAATGGGACTATCGGGTGGGTAATGAAATAGACGCGTGGGGATTCGAGGCTCTCTTCTTGGACCTTAA : 510
GTTAAACCAGCAGTAAGTAAGTACTTTAGGGATGGTCATACCATTGATGACACTTGGACAGGATGGAGTTACCAAAATGGGACTATCGGGTGGGTAATGAAATAGACGCGTGGGGATTCGAGGCTCTCTTCTTGGACCTTAA
*      520      *      540     *      560     *      580     *      600     *      620     *      640     *      660     *      680
R19 : TAAAGAGAAACCGAGTCTCTTGGTCGTAATCTGAATAGGGGGAACCTCCGCTGATCTTACTTCGGAACAAACATTTAGATTAGGCTGGTCACACTGGAATGTGATTAATCCATAGGGGATCTTCCAAATAGAGAACTCTAGGAGCAAGCAAGAA : 680
MF : TAAAGAGAAACCGAGTCTCTTGGTCGTAATCTGAATAGGGGGAACCTCCGCTGATCTTACTTCGGAACAAACATTTAGATTAGGCTGGTCACACTGGAATGTGATTAATCCATAGGGGATCTTCCAAATAGAGAACTCTAGGAGCAAGCAAGAA : 680
TAAAGAGAAACCGAGTCTCTTGGTCGTAATCTGAATAGGGGGAACCTCCGCTGATCTTACTTCGGAACAAACATTTAGATTAGGCTGGTCACACTGGAATGTGATTAATCCATAGGGGATCTTCCAAATAGAGAACTCTAGGAGCAAGCAAGAA
*      700      *      720     *      740     *      760     *      780     *      800     *      820     *      840
R19 : GAAGGCTCTAATCTTTTATGATTCAGGTTAGCTTATTGGAACAGATAGCAACAACATTTACCCGATGGTATTTTTGATTTTCCAAATGGATTCACCTCAATTAATGGAAATTTTTTGAATACGAAATATACCTTCGTTGGTCTCCGATCAAA : 850
MF : GAAGGCTCTAATCTTTTATGATTCAGGTTAGCTTATTGGAACAGATAGCAACAACATTTACCCGATGGTATTTTTGATTTTCCAAATGGATTCACCTCAATTAATGGAAATTTTTTGAATACGAAATATACCTTCGTTGGTCTCCGATCAAA : 850
GAAGGCTCTAATCTTTTATGATTCAGGTTAGCTTATTGGAACAGATAGCAACAACATTTACCCGATGGTATTTTTGATTTTCCAAATGGATTCACCTCAATTAATGGAAATTTTTTGAATACGAAATATACCTTCGTTGGTCTCCGATCAAA
*      860      *      880     *      900     *      920     *      940     *      960     *      980     *      1000    *      1020
R19 : GAATCTCTGTTAGGCACTTCGTAACCATCATACATAGCTGTTGATCAGATTTCAATCTTCTGTTTCGCTAGGCAATATGTCCATGGA : 1020
MF : GAATCTCTGTTAGGCACTTCGTAACCATCATACATAGCTGTTGATCAGATTTCAATCTTCTGTTTCGCTAGGCAATATGTCCATGGA : 1019
GATTTCTGTTAGGCACTTCGTAACCATCATACATAGCTGTTGATCAGATTTCAATCTTCTGTTTCGCTAGGCAATATGTCCATGGA
*      1040     *      1060    *      1080    *      1100    *      1120    *      1140    *      1160    *      1180
R19 : ATGGACAGATCTTCGCGCTAAGTAAATGGGAACCTTCTCCGTTACATTACATGAATCTTATTTCATTCAACCGGAAAAGGCAATTTTTTCAACAT : 1190
MF : ATGGACAGATCTTCGCGCTAAGTAAATGGGAACCTTCTCCGTTACATTACATGAATCTTATTTCATTTCAGGAAAGGCAATTTTTTCAACAT : 1189
ATGGACAGATCTTCGCGCTAAGTAAATGGGAACCTTCTCCGTTACATTACATGAATCTTATTTCATTTCAGGAAAGGCAATTTTTTCAACAT
*      1200     *      1220    *      1240    *      1260    *      1280    *      1300    *      1320    *      1340    *      1360
R19 : TCTCGGATAGGATATAGACGGAAAATCCATTAGAAATGAACATATTGGTCTTAGGCCATCTCTGGCCTGAAACCAATTCAGAGTGGTTCTTCCGTAATCTTGATAAACAGCGTTATATATAGATATAGGAGGATCTGTTGGGAAATAGAACCCCTTT : 1360
MF : TCTCGGATAGGATATAGACGGAAAATCCATTAGAAATGAACATATTGGTCTTAGGCCATCTCTGGCCTGAAACCAATTCAGAGTGGTTCTTCCGTAATCTTGATAAACAGCGTTATATATAGATATAGGAGGATCTGTTGGGAAATAGAACCCCTTT : 1359
TCTCGGATAGGATATAGACGGAAAATCCATTAGAAATGAACATATTGGTCTTAGGCCATCTCTGGCCTGAAACCAATTCAGAGTGGTTCTTCCGTAATCTTGATAAACAGCGTTATATATAGATATAGGAGGATCTGTTGGGAAATAGAACCCCTTT
*      1380     *      1400    *      1420    *      1440    *      1460    *      1480    *      1500    *      1520
R19 : GACATCTCTCATCTGAAAGATCTTCGATGTGAAAACACAGGAAAGGGCTGATCTTGAATAGAAAGAGTGGATCTCGGGGTCACAAA : 1530
MF : GACATCTCTCATCTGAAAGATCTTCGATGTGAAAACACAGGAAAGGGCTGATCTTGAATAGAAAGAGTGGATCTCGGGGTCACAAA : 1529
GACATCTCTCATCTGAAAGATCTTCGATGTGAAAACACAGGAAAGGGCTGATCTTGAATAGAAAGAGTGGATCTCGGGGTCACAAA
*      1540     *      1560    *      1580    *      1600    *      1620    *      1640    *      1660    *      1680
R19 : CTGGAGAACTCCGAAATATCTGCTGAACCTCATTTTTCATCAATATCTCCGCTCGCCGAAATCGGCGGGAATGGCAATCCCAATTCAGCTTTCGATGAAATCAATAGAAAACGCGCGGGCCGATATCTAGGACGCCAACTATCTGAA : 1700
MF : CTGGAGAACTCCGAAATATCTGCTGAACCTCATTTTTCATCAATATCTCCGCTCGCCGAAATCGGCGGGAATGGCAATCCCAATTCAGCTTTCGATGAAATCAATAGAAAACGCGCGGGCCGATATCTAGGACGCCAACTATCTGAA : 1699
CTGGAGAACTCCGAAATATCTGCTGAACCTCATTTTTCATCAATATCTCCGCTCGCCGAAATCGGCGGGAATGGCAATCCCAATTCAGCTTTCGATGAAATCAATAGAAAACGCGCGGGCCGATATCTAGGACGCCAACTATCTGAA
CTCCGAGAACCTCCGAAATATCTGCTGAACCTCATTTTTCATCAATATCTCCGCTCGCCGAAATCGGCGGGAATGGCAATCCCAATTCAGCTTTCGATGAAATCAATAGAAAACGCGCGGGCCGATATCTAGGACGCCAACTATCTGAA
*      1720     *      1740    *      1760    *      1780    *      1800    *      1820    *      1840    *      1860
R19 : TGAATAAATCTCCCTCTATCTGTTCGCGGTCGAGGACGCTCTCTCCTCCCTTCTCAAACTCCGATTGTAATTTTCTAGAGAAATCTCGATCAAGATAGAAACAGATCCATCTGCAATATATAAGGGATCCCTTGGTCGGCAAGAAAAGCAATGTCAAT : 1870
MF : TGAATAAATCTCCCTCTATCTGTTCGCGGTCGAGGACGCTCTCTCCTCCCTTCTCAAACTCCGATTGTAATTTTCTAGAGAAATCTCGATCAAGATAGAAACAGATCCATCTGCAATATATAAGGGATCCCTTGGTCGGCAAGAAAAGCAATGTCAAT : 1869
TGAATAAATCTCCCTCTATCTGTTCGCGGTCGAGGACGCTCTCTCCTCCCTTCTCAAACTCCGATTGTAATTTTCTAGAGAAATCTCGATCAAGATAGAAACAGATCCATCTGCAATATATAAGGGATCCCTTGGTCGGCAAGAAAAGCAATGTCAAT
*      1880
R19 : GATCATTAACAACCTGCAAT : 1895
MF : GATCATTAACAACCTGCAAT : 1894
GATCATTAACAACCTGCAAT

```

Figure S2 Comparison of mitochondrial DNA from CMS and revertant lines of *B. juncea*.

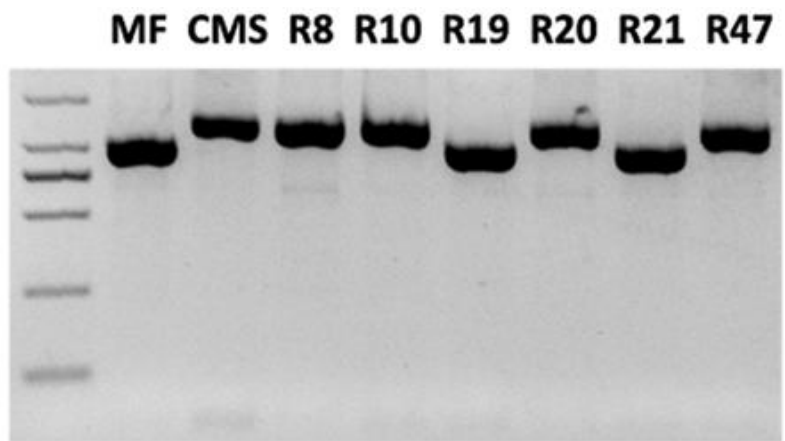

Figure S3 Mitochondrial genome rearrangement of the *atpA* gene.

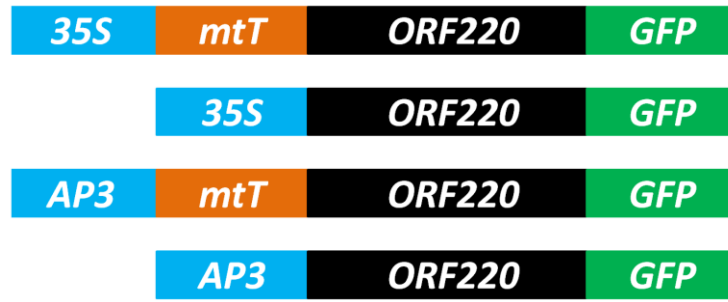

Figure S4 Schematic diagram of ORF220 gene construction.

**A**

```

At3G24230 : MHWIATRNAVVSIPKWR--FFFRSSYRYYSLLKSSILLNRRYSEGISCTDGGKSLRRTTAS--KKVKT--SSDVLTDKDLSHLWVWKERLQT : 89
BjuA074077 : MHWIATRNAVVSIPRWRSEAFIFRSPFRTHSSLLKSSILLNRRYSEDRYCLDGGKSVRGITTSKKVKTKSSDVLTDKDLSHLWVWKERLQT : 94
BjuB062106 : MHWIATRNAVVSIPRWRSEAFIFRSPFRTHSSLLKSSILLNRRYSEDRYCLDGGKSVRGITTSKKVKTKSSDVLTDKDLSHLWVWKERLQT : 93
MHWIATRNAVVSIP4WRsfaFIFRSP5RThSSLLKpSp 6LLN RYSer yCLgDgKS6RgITTaSSKKVTKs DVLTDKDLSHL6WVWKERLQT

At3G24230 : CKKPSTLQIERIMYTNLLGLDPSLRNGSLKDGNLNWEMLQFKSRFPREVLLCFVGGFYEAIGIDACIIVEYAGLNPFPGGLRSDSPKAGCP66 : 183
BjuA074077 : CKKPSTLQIERIMYTNLLGLDPSLRNGSLKDGNLNWEMLQFKSRFPREVLLCFVGGFYEAIGIDACIIVEYAGLNPFPGGLRSDSPKAGCFV : 188
BjuB062106 : CKKPSTLQIERIMYTNLLGLDPSLRNGSLKDGNLNWEMLQFKSRFPREVLLCFVGGFYEAIGIDACIIVEYAGLNPFPGGLRSDSPKAGCFV : 187
CKKPSTLQIERIMYTNLLGLDPSLRNGSLKDGNLNWEMLQFKSRFPREVLLCFVGGFYEAIGIDACIIVEYAGLNPFPGGLRSDS PKAGCP66

At3G24230 : NLRQTDLDDLRNGYSVCIVVEEQGPTPARSRKGRFISGHAHPGSPYVYGI VGVHDHDLDFPEMEVVGISRSARGYCMISIFETMKAYSLDDGLT : 277
BjuA074077 : NLRQTDLDDLRNGYSVCIVVEEQGPTPARSRKGRFISGHAHPGSPYVYGI VGVHDHDLDFPEMEVVGISRSARGYCMISIFETMKAYSLDDGLT : 282
BjuB062106 : NLRQTDLDDLRNGYSVCIVVEEQGPTPARSRKGRFISGHAHPGSPYVYGI VGVHDHDLDFPEMEVVGISRSARGYCMISIFETMKAYSLDDGLT : 281
NLRQTDLDDLRNGYSVCIVVEEQGPTPARSRKGRFISGHAHPGSPYVYGI VGVHDHDLDFPEMEVVGISRSARGYCMISIFETMKAYSLDDGLT

At3G24230 : EEALVTKLRRCHHLEFLHASLRNASGTCRWGFGEGGLWGCESGRNFEWFEFGDTLSELLSKVKVIVYGLDDEVSRFNVNVPENRPRLHLG : 371
BjuA074077 : EEALVTKLRRCHHLEFLHASLRNASGTCRWGFGEGGLWGCESGRNFEWFEFGDTLSELLSKVKVIVYGLDDEVSRFNVNVPENRPRLHLG : 376
BjuB062106 : EEALVTKLRRCHHLEFLHASLRNASGTCRWGFGEGGLWGCESGRNFEWFEFGDTLSELLSKVKVIVYGLDDEVSRFNVNVPENRPRLHLG : 375
EEALVTKLRRCHHLEFLHASLRNASGTCRWGFGEGGLWGCESGRNFEWFEFGDTLSELL34V4IVYGLDDEVSRFNVNVPENRPRLHLG

At3G24230 : TATQIGALPTEGIPCLLKVLLPSTCSGLPSLYVRDLLNPPAYDIALKIQTCKLMSTVTCSEPEFTCVSSAKIVKLEQREANYIEFCRKNV : 465
BjuA074077 : TATQIGALPTEGIPCLLKVLLPSTCSGLPSLYVRDLLNPPAYDIALKIQTCKLMSTVTCSEPEFTCVSSAKIVKLEQREANYIEFCRKNV : 470
BjuB062106 : TATQIGALPTEGIPCLLKVLLPSTCSGLPSLYVRDLLNPPAYDIALKIQTCKLMSTVTCSEPEFTCVSSAKIVKLEQREANYIEFCRKNV : 469
TATQIGALPTEGIPCLLKVLLPSTCSGLPSLY6RDLNPPAYDIALKIQTCKLMST6TCS6PEFTCVSSAKIVKLEQREANYIEFCRKNV

At3G24230 : LDFVLMHMRHPEIVEILKLLMPTWVATGLKIDFETVNECHWASD3IGEMISLDD1ESHQNVSKa6N6NEFFYDMESSWRGFKVGIHIEET : 559
BjuA074077 : LDFVLMHMRHPEIVEILKLLMPTWVATGLKIDFETVNECHWASD3IGEMISLDD1ESHQNVSKa6N6NEFFYDMESSWRGFKVGIHIEET : 564
BjuB062106 : LDFVLMHMRHPEIVEILKLLMPTWVATGLKIDFETVNECHWASD3IGEMISLDD1ESHQNVSKa6N6NEFFYDMESSWRGFKVGIHIEET : 563
LDFVLMHMRHPEIVEILKLLMPTWVATGLKIDFETVNECHWASD3IGEMISLDD1ESHQNVSKa6N6NEFFYDMESSWRGFKVGIHIEET

At3G24230 : TCVKSAEALSLAVEDFHPHISRIKAmASLGGsKGEIYA4EHESVWFKGRFPTS6WgTAGEeQIKQLKPAIDSKGKVGVEEFTTqKVE : 653
BjuA074077 : TCVKSAEALSLAVEDFHPHISRIKAmASLGGsKGEIYA4EHESVWFKGRFPTS6WgTAGEeQIKQLKPAIDSKGKVGVEEFTTqKVE : 658
BjuB062106 : TCVKSAEALSLAVEDFHPHISRIKAmASLGGsKGEIYA4EHESVWFKGRFPTS6WgTAGEeQIKQLKPAIDSKGKVGVEEFTTqKVE : 657
TCVKSAAEALSLAV EDFHPHISRIKAmASLGGsKGEI YA4EHESVWFKGRFPTS6WgTAGEeQIKQLKPAIDSKGKVGVEEFTTqKVE

At3G24230 : AIVRYHEASENANARVLELLELRLSARQTKINIVFASMLIVIAKALFESHACGRRRKKWFPTLVGFSDEANPLDGGATRMKILGLSPYWF : 746
BjuA074077 : AIVRYHEASENANARVLELLELRLSARQTKINIVFASMLIVIAKALFESHACGRRRKKWFPTLVGFSDEANPLDGGATRMKILGLSPYWF : 752
BjuB062106 : AIVRYHEASENANARVLELLELRLSARQTKINIVFASMLIVIAKALFESHACGRRRKKWFPTLVGFSDEANPLDGGATRMKILGLSPYWF : 751
AIVRYHEASENANARVLELLELRLSARQTKINIVFASMLIVIAKALFESHACGRRRKKWFPTLVGFSDEANPLDGGATRMKILGLSPYWF

At3G24230 : DVASGTAVHNTVDMQSLFLLTGFGNGGKSSLLRSCAAALLGIGEMVFAESAYIPHFDSIMLHMKSYSFVQDGKSSFCVEMSEIRSVSQATS : 840
BjuA074077 : DVASGTAVHNTVDMQSLFLLTGFGNGGKSSLLRSCAAALLGIGEMVFAESAYIPHFDSIMLHMKSYSFVQDGKSSFCVEMSEIRSVSQATS : 846
BjuB062106 : DVASGTAVHNTVDMQSLFLLTGFGNGGKSSLLRSCAAALLGIGEMVFAESAYIPHFDSIMLHMKSYSFVQDGKSSFCVEMSEIRSVSQATS : 845
DVASGTAVHNTVDMQSLFLLTGFGNGGKSSLLRSCAAALLGIGEMVFAESAYIPHFDSIMLHMKSYSFVQDGKSSFCVEMSEIRSVSQATS

At3G24230 : RSVLIDEICRGTEATAGTCIAGSV6ESLdASGCLGIVSTHLHGIFDLPLTARN6TYKAMGAENVEGQTKPTWKLTDGVCRESLAFETAKREGV : 934
BjuA074077 : RSVLIDEICRGTEATAGTCIAGSV6ESLdASGCLGIVSTHLHGIFDLPLTARN6TYKAMGAENVEGQTKPTWKLTDGVCRESLAFETAKREGV : 940
BjuB062106 : RSVLIDEICRGTEATAGTCIAGSV6ESLdASGCLGIVSTHLHGIFDLPLTARN6TYKAMGAENVEGQTKPTWKLTDGVCRESLAFETAKREGV : 939
4SVLIDEICRGTEATAGTCIAGSV6ESLdASGCLGIVSTHLHGIFDLPLTARN6TYKAMGAENVEGQTKPTWKLTDGVCRESLAFETAKREGV

At3G24230 : PESVIQRAEALYLSVYAKDaSgVV4P kt tSS1N 2IsKFVsERSLEKDLAKAI6KICGKRM Epgv6ECLSIGARELPPPSTVGSSCVY : 1028
BjuA074077 : PESVIQRAEALYLSVYAKDaSgVV4P kt tSS1N 2IsKFVsERSLEKDLAKAI6KICGKRM Epgv6ECLSIGARELPPPSTVGSSCVY : 1032
BjuB062106 : PESVIQRAEALYLSVYAKDaSgVV4P kt tSS1N 2IsKFVsERSLEKDLAKAI6KICGKRM Epgv6ECLSIGARELPPPSTVGSSCVY : 1033
PE 6IQRAEALYLSVYAKDaS gVV4P kt tSS1N 2IsKFVsERSLEKDLAKAI6KICGKRM Epgv6ECLSIGARELPPPSTVGSSCVY

At3G24230 : VMRRPDKRLYIGQTDDELEGRIRAHRAKEGLQSSFLYLVQCGKSMACQLETLLINQLHEQCYSLANLADGKHRNFQTSSTSS6 ASDVVSIS : 1118
BjuA074077 : VMRRPDKRLYIGQTDDELEGRIRAHRAKEGLQSSFLYLVQCGKSMACQLETLLINQLHEQCYSLANLADGKHRNFQTSSTSS6 ASDVVSIS : 1122
BjuB062106 : VMRRPDKRLYIGQTDDELEGRIRAHRAKEGLQSSFLYLVQCGKSMACQLETLLINQLHEQCYSLANLADGKHRNFQTSSTSS6 ASDVVSIS : 1123
VM4RPPDKRLYIGQTDDELEGRIRAHRAKEGLQSSFLYLVQCGKSMACQLETLLINQLHEQCYSLANLADGKHRNFQTSSTSS6 ASDVVSIS

```

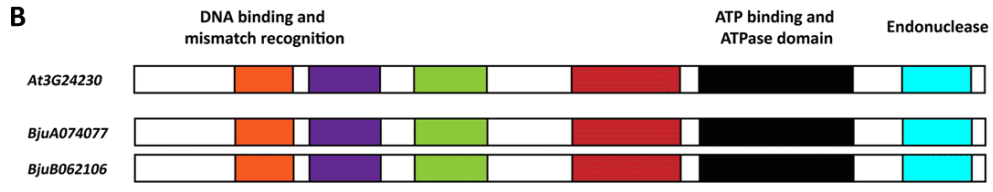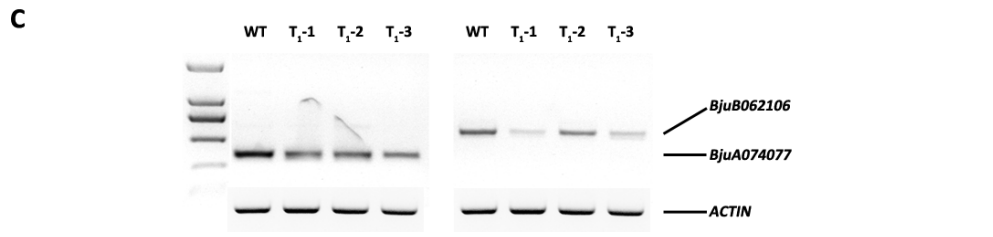

Figure S5 *MSH1* from *B. juncea* and comparison with its ortholog in *A. thaliana*.

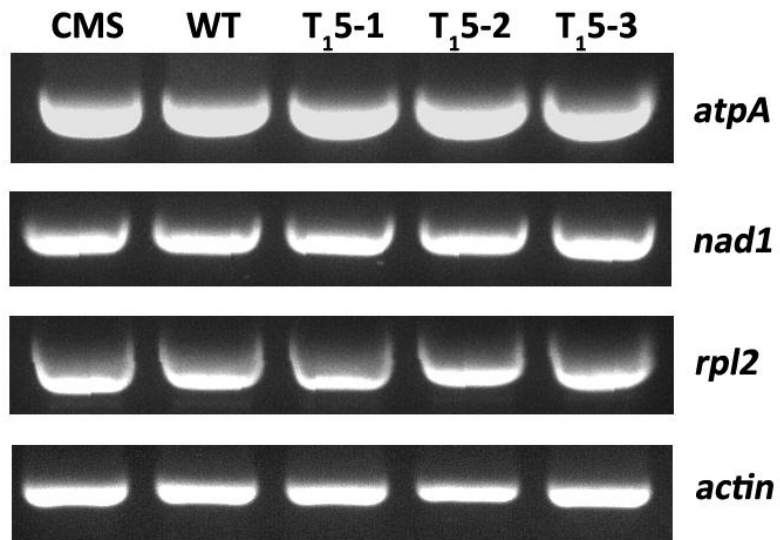

Figure S6 Substoichiometric shifting of mitochondrial genes in MSH1-RNAi lines relative to wild type.

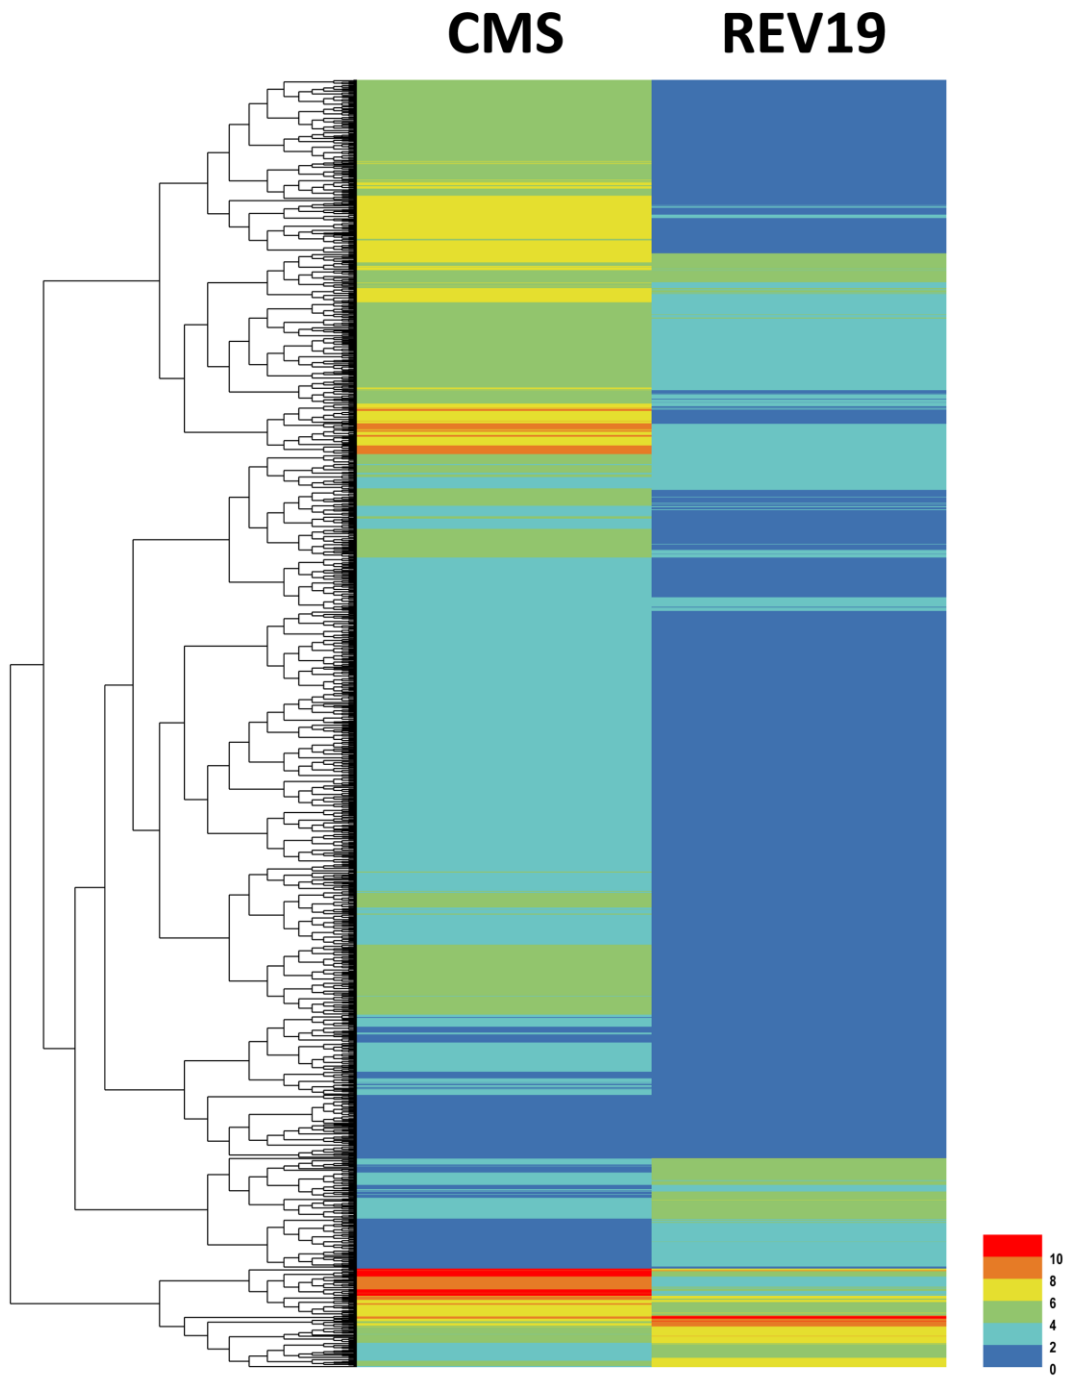

Figure S7 Genes differentially expressed between CMS and REV19 lines of *B. juncea* by RNA-seq.



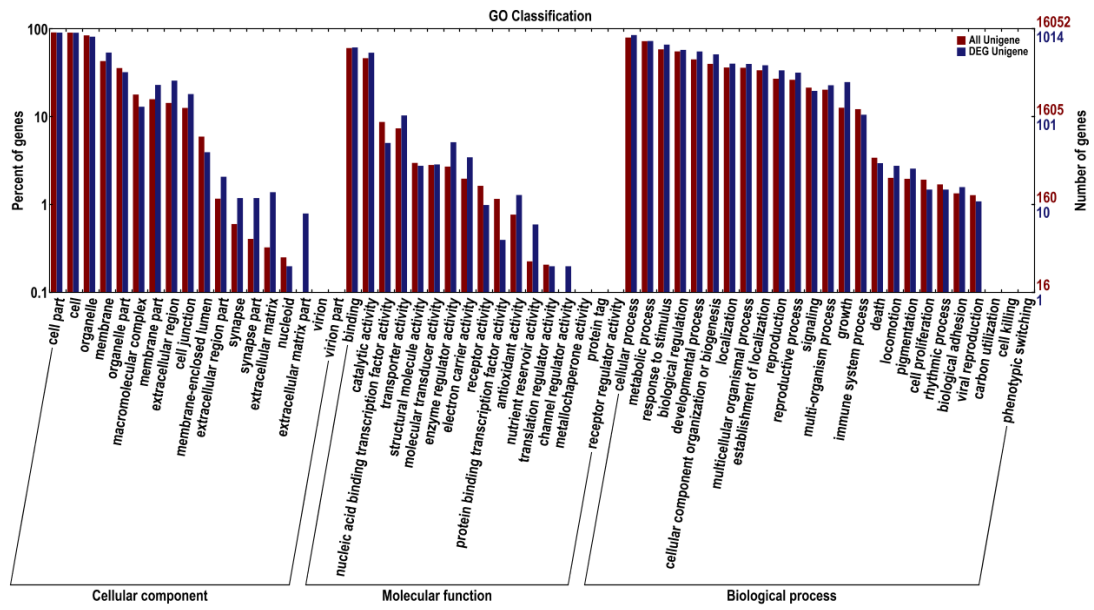

Figure S8 Gene Ontology (GO) enrichment analysis of differentially expressed genes.

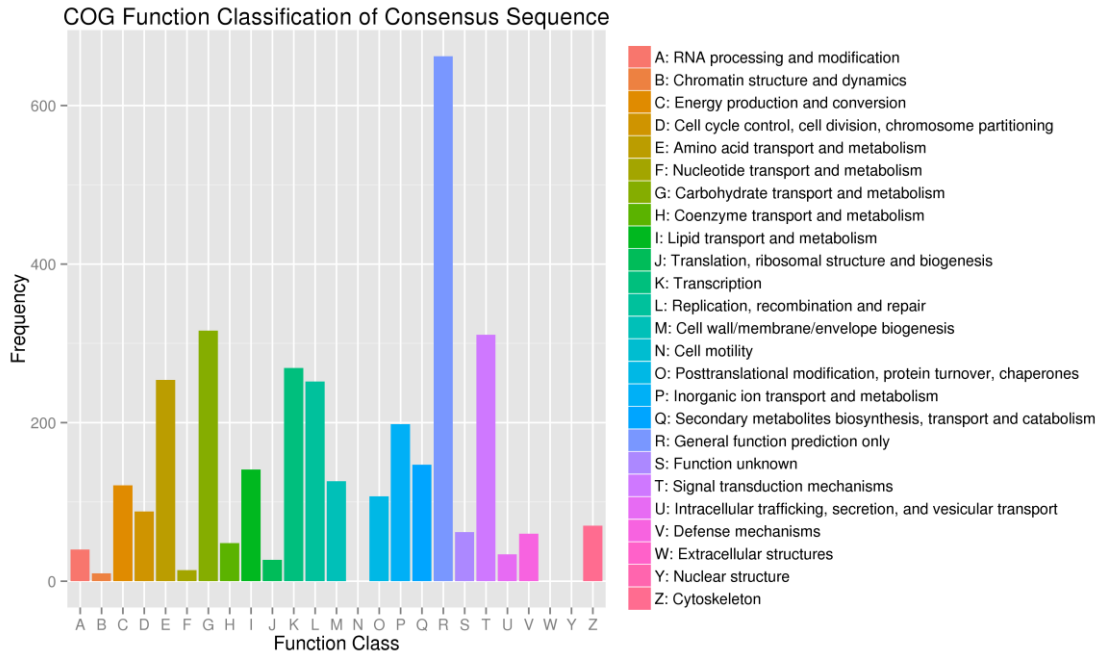

Figure S9 Clusters of Orthologous Groups (COG) analysis of differentially expressed genes.

Table S1 Primers used in this study

| <b>Gene</b>                | <b>Forward primer</b>     | <b>Reverse primer</b>      |
|----------------------------|---------------------------|----------------------------|
| <i>ORF220-SSS</i>          | ATGCCTCAACTGGATAAATTCACTT | TCATCGATAGAGATCGAGAATTTTCG |
| <i>atpA</i>                | GCTGCTTACAGGAGTTAGCC      | GTCCAATCGCTACATAGACA       |
| <i>ACTIN</i>               | CGCCGAGCGGGAAATCGTC       | GGAAAGTGCTGAGGGATGC        |
| <i>ORF220-Construction</i> | CGAAACCAACTGCTTTCACA      | TTCGTTTCATCCTGGCTCTCT      |
| <i>AP3 promoter</i>        | CAGTAACTGTGGCCAACTTAGT    | ATTCTTCTCTTTTGTTTAATCTTT   |
| <i>mt-targeted</i>         | CCATGGCTTCTCGGAGGCTTCT    | CGCTGCGGAGGTAGCGTACTG      |
| <i>RT-MSH1-A</i>           | AAGAATACGTGCGCATAGGG      | AAGCAAAAACGGCATAACATTG     |
| <i>RT-MSH1-B</i>           | GCTTCATCGGACAATAGCCAC     | CCTGCCGTTTGCAATATCTC       |
| <i>Q-ORF220</i>            | GGAGATTCGAAGCCTACAGC      | ATCGAGGATCTCGTTCATCC       |
| <i>Q-AMS</i>               | TACCGGGAGGATTAGTGGAG      | TCATGTTAATCGTTGCGGTT       |
| <i>Q-AP3</i>               | GGTGTGTGTGATGCTAGGG       | CAACATCAGAAACCGTTTGG       |
| <i>Q-C2H2</i>              | ACAACACGATGAGGGCAATA      | AAGCATTCCCTGAATTGGAC       |
| <i>Q-DYT1</i>              | CATGGGAAGTGAACCTGTGG      | TTAGGTATCGGTCCAAGCC        |
| <i>Q-GH3</i>               | AAGCGCAACACATTTACTCG      | ACTTTCGCGTCCTTGAGTTT       |
| <i>Q-MYB99</i>             | GAGGTTGGAICTAGAAAGGG      | GCTTGCTCCACGTGTTCTTA       |
| <i>Q-MYB103</i>            | CACGGTGGAATACGTACAGC      | CCACCACTTCTCCCTCAAT        |
| <i>Q-MS1</i>               | CTCATGGGAAGTTGGTCCTT      | GCAACGGAGGTTAAGAGAGG       |
| <i>Q-MS2</i>               | GCGGTTAAAGAACGAGGTGT      | TCTGTTTGCAACCCAATGTT       |
| <i>Q-PI</i>                | GCTGCAACAACAAGAGATGG      | GGTTGAATCGGCTGAACTCT       |
| <i>Q-SHN1</i>              | CTGACATCTCAGCCTCCTCA      | AGACTTGCAGCATTTCTCTCA      |
| <i>Q-SPL</i>               | GTACTIONCAACGAGGCGACAA    | GATGTAGCCACTGGAAACGA       |
| <i>Q-SPL8</i>              | GCTCGATTTCACTTCCAACA      | TACAGCCTGCTCACGAAATC       |
| <i>Q-WUS</i>               | CCAAGAGAGCGGTAACAACA      | AGGATTCTGATCTGCTCCGT       |
| <i>Q-4CL3</i>              | CACCGTTATCACCACAGAGG      | GTGCCAGAGGAGAAAGGAAG       |
| <i>Q-25S</i>               | CGGTTCTCTCGTACTAGGTTGA    | CCGTCGTGAGACAGGTTAGTTTT    |

Table S2 Statistic of candidate revertant event from CMS *B. juncea*

| CMS plant number    | Seed number | Sterile | Fertile |
|---------------------|-------------|---------|---------|
| 1                   | 5           | 5       | 0       |
| 2                   | 5           | 5       | 0       |
| 3                   | 4           | 4       | 0       |
| 4                   | 4           | 4       | 0       |
| 5                   | 3           | 3       | 0       |
| 6                   | 3           | 3       | 0       |
| 7                   | 3           | 3       | 0       |
| 8                   | 2           | 2       | 0       |
| 9                   | 2           | 2       | 0       |
| 10                  | 2           | 2       | 0       |
| 11                  | 2           | 2       | 0       |
| 12                  | 2           | 2       | 0       |
| 13                  | 1           | 1       | 0       |
| 14                  | 1           | 1       | 0       |
| 15                  | 1           | 1       | 0       |
| 16                  | 1           | 1       | 0       |
| 17                  | 1           | 1       | 0       |
| 18                  | 1           | 1       | 0       |
| 19                  | 7           | 5       | 2       |
| 20                  | 1           | 1       | 0       |
| 21                  | 1           | 1       | 0       |
| 22                  | 1           | 1       | 0       |
| From No. 23 - No.39 | 0           | 0       | 0       |
| Total               | 53          | 51      | 2       |

Table S3 Statistic of fertility of ORF220 expression in *Arabidopsis*

|              | <i>ORF220</i> |         | <i>mt target-ORF220</i> |         |
|--------------|---------------|---------|-------------------------|---------|
|              | Sterile       | Fertile | Sterile                 | Fertile |
| 35S promoter | 0             | 20      | 17                      | 42      |
| AP3 promoter | 1             | 13      | 28                      | 0       |
